# Supplementary material for: Dupuytren’s and Ledderhose Diseases in a Family with LMNA-Related Cardiomyopathy and a Novel Variant in the ASTE1 Gene
Source: PubMed Central journal article supplement (PMC5753070; doi:10.3390/cells6040040), 2017-11-01
Supplement: cells-06-00040-s001.pdf [file cells-06-00040-s001.pdf]

**Table S1. Main clinical features of the study family.**

| ID <sup>a</sup> | Sex | Age (y)   | Cardiac History (Age at Diagnosis) <sup>b</sup>                          | Dupuytren's Disease (Px Age) | Ledderhose Disease (Px Age) | Other Significant Medical and Social History          |
|-----------------|-----|-----------|--------------------------------------------------------------------------|------------------------------|-----------------------------|-------------------------------------------------------|
| I-1             | M   | d.59      | Unknown                                                                  | Unknown                      | Unknown                     | Unknown                                               |
| I-2             | F   | d.51      | Sudden death (51)                                                        | Unknown                      | Unknown                     | Unknown                                               |
| I-3             | M   | d.80      | Unknown                                                                  | Unknown                      | Unknown                     | Unknown                                               |
| I-4             | F   | d.75      | Unknown                                                                  | Unknown                      | Unknown                     | Unknown                                               |
| II-1            | M   | d.neonate | Unknown                                                                  | Unknown                      | Unknown                     | Unknown                                               |
| II-2            | F   | d.52      | Sudden death (52)                                                        | Unknown                      | Unknown                     | Unknown                                               |
| II-3            | M   | d.74      | Unknown                                                                  | Unknown                      | Unknown                     | Unknown                                               |
| II-4            | F   | d.16      | Unknown                                                                  | Unknown                      | Unknown                     | Unknown                                               |
| II-5            | M   | d.53      | Sudden death (53)                                                        | Unknown                      | Unknown                     | Unknown                                               |
| II-6            | F   | d.87      | Unknown                                                                  | Unknown                      | Unknown                     | Unknown                                               |
| II-7            | M   | d.68      | Irregular heart beat (40s), pacemaker (64), HF (66), cardiac arrest (68) | Unknown                      | Unknown                     | Unknown                                               |
| II-8            | F   | d.79      | None                                                                     | Yes (40s), Surgery x1 (60)   | Unknown                     | Emphysema, lung cancer (79), alcoholism, tobacco use  |
| II-9            | M   | d.unknown | Unknown                                                                  | Unknown                      | Unknown                     | Unknown                                               |
| III-1           | M   | d.58      | CAD, MI (31, 58)                                                         | No                           | Unknown                     | None                                                  |
| III-2           | F   | d.74      | AF, DCM, HF, ICD (68), ASD-repair (73), VT (72), pulmonary HTN (73)      | Yes (50s), Surgery x1 (60)   | No                          | Myelodysplastic syndrome, chronic renal insufficiency |
| III-3           | M   | d.76      | None                                                                     | No                           | No                          | Brain tumor (76)                                      |
| III-4           | F   | 75        | AFL (61), bradycardia, pacemaker (66), ICD (73), normal echo (73)        | Yes (40s)                    | Yes (40s)                   | None                                                  |
| III-5           | M   | d.57      | Irregular heart beat (50s), enlarged heart (55), sudden death, HF (57)   | Yes (20s), Surgery x4        | No                          | Alcohol binge drinking                                |
| III-6           | F   | 80        | Unknown                                                                  | Unknown                      | Unknown                     | Unknown                                               |
| IV-1            | F   | 60        | None, normal echo, holter studies (56)                                   | No                           | No                          | None                                                  |
| IV-2            | F   | 58        | Syncope, SSS, pacemaker (45), AF, NSVT, AV block, DCM, ICD (55)          | Yes (50)                     | Yes (55)                    | Hyperlipidemia                                        |
| IV-3            | F   | 55        | Syncope x3 (50, 52, 53), bradycardia (50), normal echo (53)              | No                           | Yes (51)                    | None, normal CK (50)                                  |
| IV-4            | F   | 49        | Dyspnea, bradycardia, palpitations, mild DCM (42), PVCs, NSVT (47)       | No                           | Plantar nodule?             | None                                                  |
| IV-5            | F   | 47        | None, normal echo, EKG (37)                                              | No                           | No                          | Hypothyroidism                                        |

<sup>a</sup>Individuals with cardiac disease (arrhythmia, ventricular dysfunction, sudden death) with or without Dupuytren's Disease are highlighted in yellow (n=10). The maternal grandmother with Dupuytren's Disease and no cardiac disease is highlighted in green.

<sup>b</sup>Clinical features for an additional family member was removed after consent to publish was declined.

Abbreviations: y, years old; Px, presentation; d., died; HF, heart failure; CAD, coronary artery disease; MI, myocardial infarction; AF, atrial fibrillation; DCM, dilated cardiomyopathy; ICD, implantable cardiac defibrillator; ASD, atrial septal defect; VT, ventricular tachycardia; HTN, hypertension; AFL, atrial flutter; SSS, sick sinus syndrome; NSVT, nonsustained ventricular tachycardia; PVC, premature ventricular contraction; CK, creatine kinase

**Table S2. Exome Sequencing Studies of Four Family Members: Sequencing-Mapping & Variant Calling-Filtering**

|                                  | Family Member |               |               |               | All Four<br>Family Members:<br>Average/Sample |
|----------------------------------|---------------|---------------|---------------|---------------|-----------------------------------------------|
|                                  | III-4         | IV-3          | Patient 3     | IV-1          |                                               |
| <b>Hand/Feet Phenotype</b>       | DD & LD       | LD only       | DD only       | Unaffected    |                                               |
| <b>Sequencing-Mapping</b>        |               |               |               |               |                                               |
| Raw data (bp)                    | 7,907,552,128 | 8,967,512,187 | 7,055,268,986 | 8,411,863,057 | 8,085,549,090                                 |
| Reads-total                      | 104,800,788   | 118,853,834   | 93,507,716    | 111,492,986   | 107,163,831                                   |
| Reads mapped                     | 104,136,200   | 118,129,101   | 92,924,198    | 110,810,461   | 106,499,990                                   |
| % Reads mapped                   | 99.4%         | 99.4%         | 99.4%         | 99.4%         | 99.4%                                         |
| Mean coverage depth              | 78X           | 88X           | 72X           | 85X           | 81X                                           |
| Mean coverage $\geq$ 30X         | 85.7%         | 87.5%         | 83.2%         | 86.7%         | 85.8%                                         |
| Bases: % $\geq$ Q30              | 90.4%         | 90.5%         | 90.0%         | 90.6%         | 90.4%                                         |
| Bases: Mean Quality Score        | 32.62         | 32.64         | 32.55         | 32.67         | 32.62                                         |
| <b>Variant Calling-Filtering</b> |               |               |               |               |                                               |
| Total unique variants            | 20,144        | 20,445        | 20,576        | 20,500        | 20,416                                        |
| Heterozygous variants            | 12,555        | 12,894        | 13,093        | 12,955        | 12,874                                        |
| HET/Non-synonymous variants      | 6,327         | 6,445         | 6,614         | 6,564         | 6,488                                         |
| HET/NS/Highly-conserved variants | 1,677         | 1,681         | 1,815         | 1,761         | 1,734                                         |

Abbreviations: DD, Dupuytren's Disease; LD, Ledderhose Disease; Q, Quality Score; HET, heterozygous; NS, non-synonymous

**Table S3. Exome Sequencing Studies of Four Family Members: Candidate Variants by Allele Frequency (n=98)**

Novel or rare (allele frequency <1%) variants considered as high-priority candidates are highlighted in yellow. The USF3 variant was excluded since it is an inframe-deletion of one codon and the clinical significance of the variant is likely benign (ClinVar variant # 218482).

| Gene           | Position (hg38)          | DNA variant       | Protein change | dbSNP (rs) | ExAC Frequency |
|----------------|--------------------------|-------------------|----------------|------------|----------------|
| <i>ASTE1</i>   | Chr3:131025077           | c.230T>C          | p.Val77Ala     | novel      | no data        |
| <i>FZD2</i>    | Chr17:44558223           | c.535A>C          | p.Thr179Pro    | novel      | no data        |
| <i>FSD1</i>    | Chr19:4311959            | c.608G>A          | p.Arg203Gln    | novel      | no data        |
| <i>LMNA</i>    | Chr1:156134901           | c.736C>T          | p.Gln246Ter    | 267607587  | no data        |
| <i>USF3</i>    | Chr3:113657264-113657266 | c.4416_4418delGCA | p.Gln1478del   | 10606566   | no data        |
| <i>OR51A7</i>  | Chr11:4908132            | c.763A>G          | p.Ile255Val    | 144609747  | 0.0040         |
| <i>SYPL2</i>   | Chr1:109476793           | c.272A>T          | p.Tyr91Phe     | 79613472   | 0.0086         |
| <i>CARD14</i>  | Chr17:80202245           | c.2044C>T         | p.Arg682Trp    | 117918077  | 0.0110         |
| <i>COL24A1</i> | Chr1:86126053            | c.283G>A          | p.Val95Met     | 74097691   | 0.0127         |
| <i>OSGEPL1</i> | Chr2:189755490           | c.292G>A          | p.Ala98Thr     | 75321854   | 0.0416         |
| <i>PEX11G</i>  | Chr19:7477282            | c.436C>T          | p.Leu146Phe    | 11668511   | 0.0488         |
| <i>OR10T2</i>  | Chr1:158398602           | c.865G>A          | p.Val289Ile    | 61818748   | 0.0504         |
| <i>MUC6</i>    | Chr11:1021268            | c.3536A>G         | p.Asn1179Ser   | 113451874  | 0.0524         |
| <i>DOCK6</i>   | Chr19:11214289           | c.4324G>A         | p.Ala1442Thr   | 34243815   | 0.0681         |
| <i>FAM221A</i> | Chr7:23698272            | c.544A>G          | p.Ser182Gly    | 35928055   | 0.0791         |
| <i>COX4I1</i>  | Chr16:85801212           | c.7G>A            | p.Ala3Thr      | 11557187   | 0.0906         |
| <i>OR52L1</i>  | Chr11:5986542            | c.389C>T          | p.Ser130Leu    | 61750896   | 0.0965         |
| <i>RERGL</i>   | Chr12:18081322           | c.484A>G          | p.Met162Val    | 941048     | 0.0987         |
| <i>CAMTA1</i>  | Chr1:7737443             | c.3531C>G         | p.Asn1177Lys   | 41278952   | 0.1167         |
| <i>KANK3</i>   | Chr19:8325009-8325011    | c.2022_2024delGGA | p.Glu674del    | 111905975  | 0.1298         |
| <i>OR52J3</i>  | Chr11:5047067            | c.542G>A          | p.Cys181Tyr    | 58664826   | 0.1303         |
| <i>NLRP14</i>  | Chr11:7038750            | c.164G>A          | p.Arg55Gln     | 61063081   | 0.1500         |
| <i>TLN2</i>    | Chr15:62819540           | c.6796T>C         | p.Phe2266Leu   | 3816988    | 0.1640         |
| <i>COL24A1</i> | Chr1:86046853            | c.1922G>A         | p.Arg641His    | 60891279   | 0.1703         |
| <i>BAIAP2</i>  | Chr17:81115790           | c.1556A>G         | p.Gln519Arg    | 4969391    | 0.1823         |
| <i>RBMXL2</i>  | Chr11:7089317            | c.197C>T          | p.Ala66Val     | 11041170   | 0.2020         |
| <i>ACAN</i>    | Chr15:88872016           | c.7005C>G         | p.Asp2335Glu   | 3817428    | 0.2023         |
| <i>C5orf49</i> | Chr5:7835442             | c.204G>C          | p.Gln68His     | 6883562    | 0.2134         |
| <i>SSC4D</i>   | Chr7:76400378            | c.383G>A          | p.Arg128His    | 4728712    | 0.2209         |

|                 |                         |                 |                       |                     |        |
|-----------------|-------------------------|-----------------|-----------------------|---------------------|--------|
| <i>MATN4</i>    | Chr20:45297933          | c.1564G>A       | p.Gly522Ser           | 2227275             | 0.2300 |
| <i>PTCRA</i>    | Chr6:42923284           | c.316G>A        | p.Val106Ile           | 9471966             | 0.2383 |
| <i>PTPRG</i>    | Chr3:62203515           | c.1720G>A       | p.Gly574Ser           | 2292245             | 0.2385 |
| <i>OR13C9</i>   | Chr9:104617614          | c.591C>A        | p.Phe197Leu           | 10761054            | 0.2444 |
| <i>QRFPR</i>    | Chr4:121329579          | c.1031T>C       | p.Leu344Ser           | 2302310             | 0.2485 |
| <i>SPTA1</i>    | Chr1:158627717          | c.5572C>G       | p.Leu1858Val          | 3737515             | 0.2567 |
| <i>NRAP</i>     | Chr10:113633160         | c.1556A>T       | p.Asn519Ile           | 2270182             | 0.2638 |
| <i>GLMP</i>     | Chr1:156294149          | c.667A>G        | p.Ile223Val           | 10908495            | 0.2688 |
| <i>C21orf58</i> | Chr21:46302071-46302072 | c.578_579insCCA | p.His193_Ala194insHis | 71318063            | 0.2852 |
| <i>HDGF</i>     | Chr1:156743766          | c.650C>T        | p.Pro217Leu           | 4399146             | 0.2854 |
| <i>KRT40</i>    | Chr17:40983118          | c.458C>T        | p.Thr153Met           | 9908304             | 0.2925 |
| <i>APOB</i>     | Chr2:21008652           | c.8216C>T       | p.Pro2739Leu          | 676210              | 0.2928 |
| <i>KRT40</i>    | Chr17:40983969          | c.305G>A        | p.Ser102Asn           | 1510068             | 0.2934 |
| <i>MED12L</i>   | Chr3:151372636          | c.3629G>A       | p.Arg1210Gln          | 3732765             | 0.3060 |
| <i>ST5</i>      | Chr11:8730093           | c.1197C>G       | p.Asp399Glu           | 3812762             | 0.3119 |
| <i>CALU</i>     | Chr7:128754552          | c.245C>T        | p.Ala82Val            | 2307040             | 0.3138 |
| <i>BRCA1</i>    | Chr17:43092418          | c.3113A>G       | p.Glu1038Gly          | 16941               | 0.3429 |
| <i>MYO19</i>    | Chr17:36498436          | c.2587C>T       | p.Leu863Phe           | 2306590             | 0.3462 |
| <i>SMG6</i>     | Chr17:2188471           | c.190G>A        | p.Ala64Thr            | 903160              | 0.3491 |
| <i>CSPG4</i>    | Chr15:75677729          | c.5108G>A       | p.Arg1703His          | 8023621             | 0.3496 |
| <i>ETV1</i>     | Chr7:13939184           | c.298A>G        | p.Ser100Gly           | 9639168             | 0.3500 |
| <i>NRAP</i>     | Chr10:113590838         | c.4696C>T       | p.Arg1566Cys          | 1885434             | 0.3535 |
| <i>RHPN2</i>    | Chr19:32999660          | c.1151A>G       | p.Gln384Arg           | 74582927, 201801079 | 0.3653 |
| <i>RHBG</i>     | Chr1:156377340          | c.20G>A         | p.Gly7Asp             | 2245623             | 0.3740 |
| <i>NAALADL2</i> | Chr3:175096948          | c.232G>A        | p.Gly68Ser            | 9823911             | 0.3835 |
| <i>INO80D</i>   | Chr2:206046504          | c.1073C>T       | p.Ala358Val           | 2909111             | 0.3865 |
| <i>KRT72</i>    | Chr12:52592403          | c.791A>G        | p.Tyr264Cys           | 12833456            | 0.3870 |
| <i>DST</i>      | Chr6:56618003           | c.6031G>C       | p.Val2011Leu          | 6459166             | 0.3887 |
| <i>OR2G3</i>    | Chr1:247606450          | c.865A>G        | p.Ile289Val           | 61730407            | 0.3979 |
| <i>KRTAP4-8</i> | Chr17:41098083-41098084 | c.1_2insA       | p.Met1Asnfs           | 201764113           | 0.4025 |
| <i>BRCA1</i>    | Chr17:43092919          | c.2612C>T       | p.Pro871Leu           | 799917              | 0.4100 |
| <i>WDR72</i>    | Chr15:53710894          | c.917C>T        | p.Pro306Leu           | 551225              | 0.4113 |
| <i>EFCAB6</i>   | Chr22:43687562          | c.1051A>G       | p.Thr351Ala           | 5764214             | 0.4235 |
| <i>MROH8</i>    | Chr20:37155091          | c.1076A>G       | p.Lys359Arg           | 1615246             | 0.4285 |
| <i>THSD7A</i>   | Chr7:11469934           | c.2313C>G       | p.Asp771Glu           | 2285744             | 0.4303 |

|                 |                |           |              |           |        |
|-----------------|----------------|-----------|--------------|-----------|--------|
| <i>NBR1</i>     | Chr17:43209941 | c.2768A>G | p.His923Arg  | 8482      | 0.4349 |
| <i>ATP13A5</i>  | Chr3:193276754 | c.3392T>C | p.Val1131Ala | 2271791   | 0.4362 |
| <i>MGAM</i>     | Chr7:142065775 | c.4714A>T | p.Met1572Leu | 4507684   | 0.4367 |
| <i>TMEM241</i>  | Chr18:23373756 | c.28C>T   | p.Leu10Phe   | 8099409   | 0.4377 |
| <i>TNC</i>      | Chr9:115084301 | c.2039A>G | p.Gln680Arg  | 1061494   | 0.4408 |
| <i>HS6ST1</i>   | Chr2:128318303 | c.261C>A  | p.Asp87Glu   | 200979099 | 0.4625 |
| <i>LETMD1</i>   | Chr12:51049161 | c.250G>A  | p.Val84Ile   | 12379     | 0.4645 |
| <i>MROH8</i>    | Chr20:37112391 | c.2777A>G | p.Gln926Arg  | 1744760   | 0.4781 |
| <i>PSPC1</i>    | Chr13:19703273 | c.1474A>G | p.Met492Val  | 3852596   | 0.4797 |
| <i>RFX8</i>     | Chr2:101402446 | c.1235T>C | p.Met412Thr  | 2175968   | 0.4965 |
| <i>WDR4</i>     | Chr21:42873634 | c.213G>C  | p.Lys71Asn   | 2248490   | 0.4968 |
| <i>ANKRD35</i>  | Chr1:145872788 | c.1711C>G | p.Gln571Glu  | 11579366  | 0.5068 |
| <i>RB1CC1</i>   | Chr8:52674146  | c.701T>C  | p.Met234Thr  | 17337252  | 0.5110 |
| <i>MALRD1</i>   | Chr10:19331510 | c.3829A>G | p.Ile1277Va  | 7100403   | 0.5211 |
| <i>HELQ</i>     | Chr4:83453327  | c.916G>A  | p.Val306Ile  | 1494961   | 0.5623 |
| <i>PCMTD1</i>   | Chr8:51820490  | c.707A>T  | p.Asn236Ile  | 12335014  | 0.5638 |
| <i>TNS2</i>     | Chr12:53049172 | c.29G>C   | p.Arg10Thr   | 12369033  | 0.5647 |
| <i>RGS9BP</i>   | Chr19:32676549 | c.286G>T  | p.Ala96Ser   | 259290    | 0.5674 |
| <i>TMEM185B</i> | Chr2:120222852 | c.125C>G  | p.Ala42Gly   | 11550347  | 0.5829 |
| <i>LRP4</i>     | Chr11:46877220 | c.3256A>G | p.Ile1086Val | 6485702   | 0.5849 |
| <i>ABCA6</i>    | Chr17:69085689 | c.3965A>G | p.Asn1322Ser | 2302134   | 0.5867 |
| <i>RCBTB1</i>   | Chr13:49567209 | c.71C>T   | p.Ala24Val   | 4942848   | 0.6165 |
| <i>MRPL30</i>   | Chr2:99195607  | c.388G>A  | p.Ala130Thr  | 1044575   | 0.6366 |
| <i>PAPPA</i>    | Chr9:116344602 | c.3671C>A | p.Ser1224Tyr | 7020782   | 0.6687 |
| <i>C9orf129</i> | Chr9:93335465  | c.274G>A  | p.Gly92Ser   | 3122944   | 0.7128 |
| <i>WDR91</i>    | Chr7:135204389 | c.770C>T  | p.Pro257Leu  | 292592    | 0.7135 |
| <i>GEN1</i>     | Chr2:17761508  | c.274T>A  | p.Ser92Thr   | 1812152   | 0.7138 |
| <i>EPB41L4A</i> | Chr5:112184043 | c.1595A>G | p.Asn532Ser  | 1560058   | 0.7349 |
| <i>ADGRE2</i>   | Chr19:14751618 | c.1668G>C | p.Leu556Phe  | 2524383   | 0.7371 |
| <i>KRT74</i>    | Chr12:52571389 | c.813A>C  | p.Glu271Asp  | 670741    | 0.7449 |
| <i>OBSL1</i>    | Chr2:219556695 | c.4095G>C | p.Glu1365Asp | 1983210   | 0.7461 |
| <i>OR56B1</i>   | Chr11:5736832  | c.316T>C  | p.Cys106Arg  | 7397032   | 0.8171 |
| <i>ZZEF1</i>    | Chr17:4142807  | c.89T>C   | p.Val30Ala   | 1454121   | 0.8454 |
| <i>BRDT</i>     | Chr1:91962938  | c.184C>A  | p.Gln62Lys   | 10783071  | 0.8763 |
